# Supplementary material for: Molecular dynamics simulation of heterogeneous nucleation on nanotubes
Source: Royal Society of Chemistry journal article supplement (doi:10.1039/c5ra04398k), 2015-01-01
Supplement: c5ra04398k1.pdf [file c5ra04398k1.pdf]

ASSOCIATED CONTENT Supporting Information for: Molecular Dynamics Simulation of Heterogeneous Nucleation on Nanotubes

Donguk Suh<sup>1\*</sup>, Kenji Yasuoka<sup>1</sup>, and Xiao Cheng Zeng<sup>2</sup>

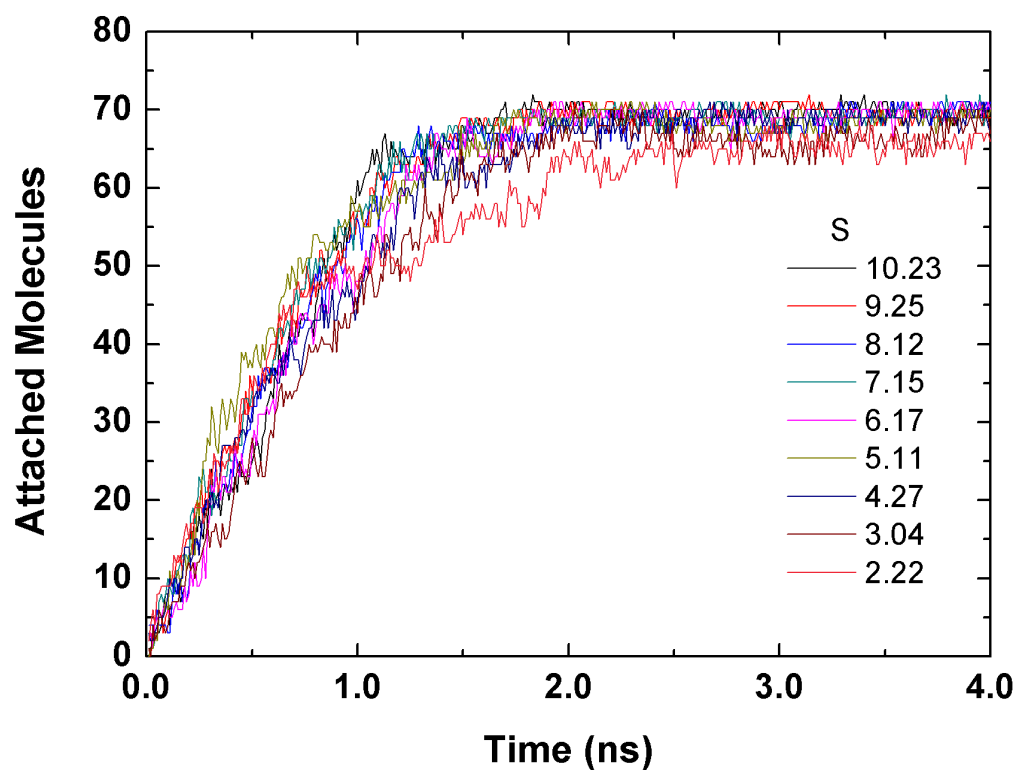

(a) In L1D1

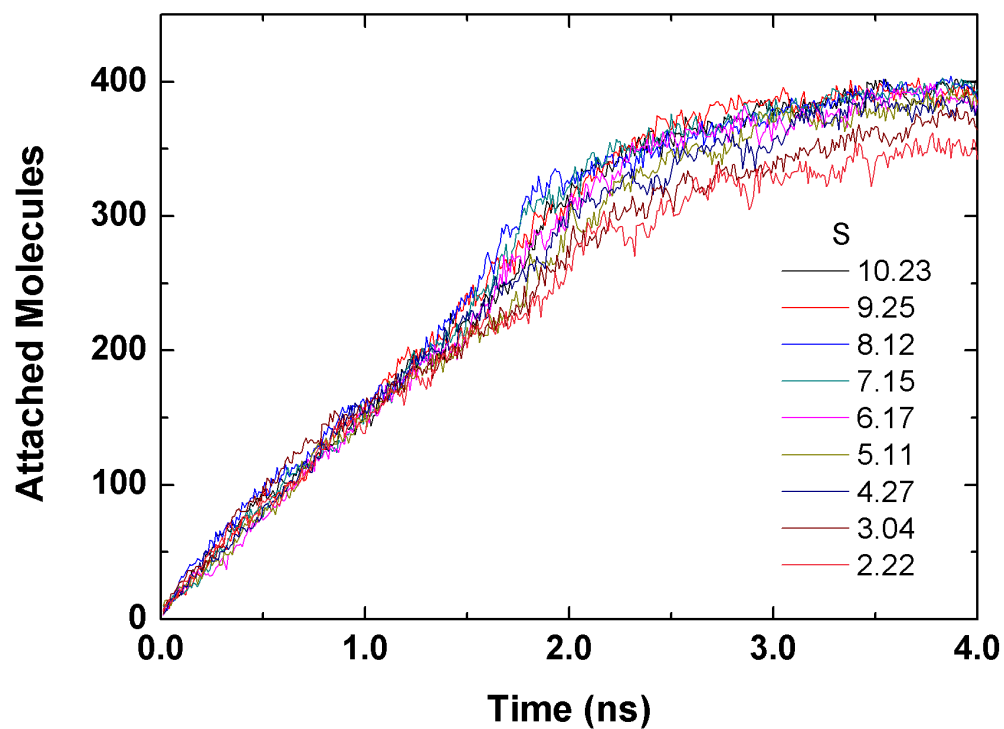

(b) In L1D2

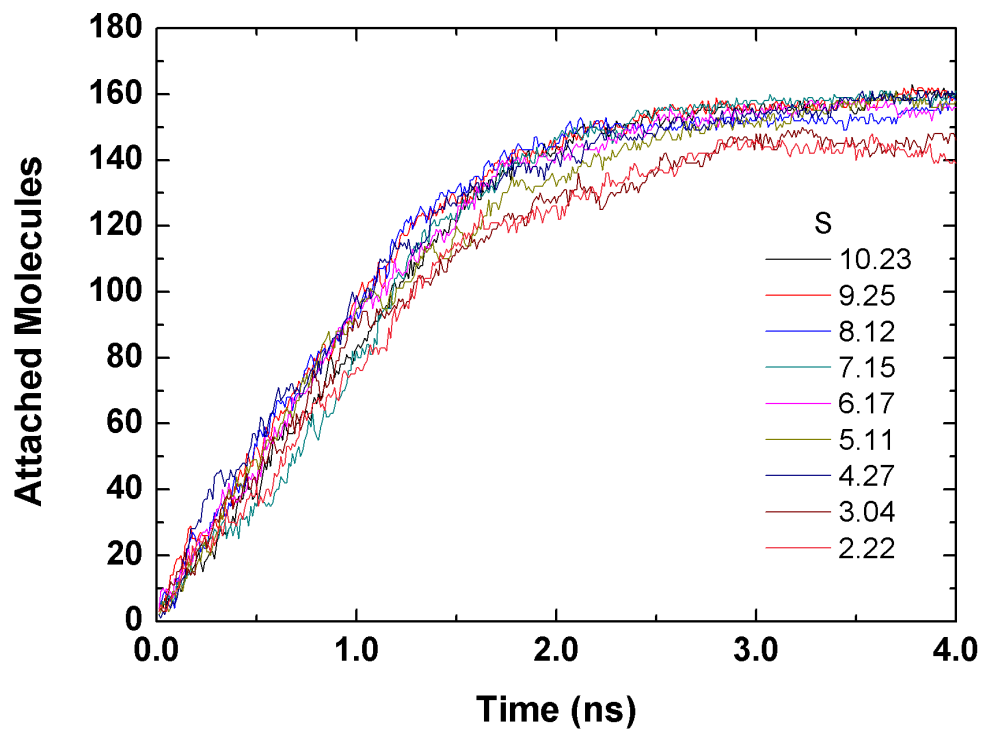

(c) In L2D1

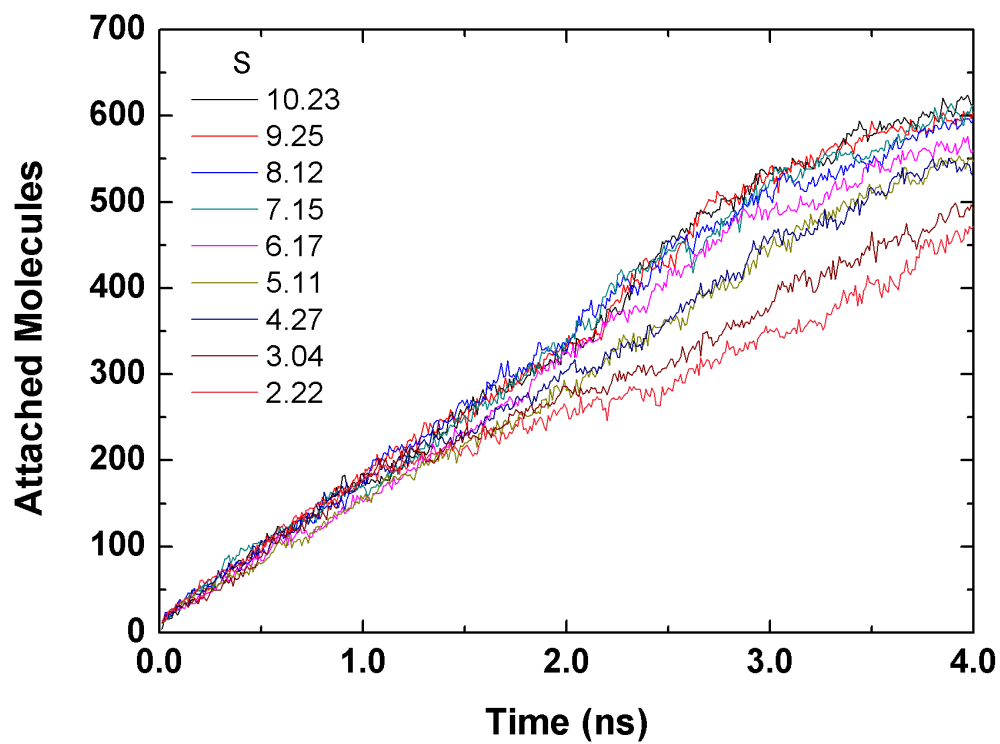

(d) In L2D2

Fig. S1 Time evolution of inside growth (a) L1D1 (b) L1D2 (c) L2D1 and (d) L2D2.

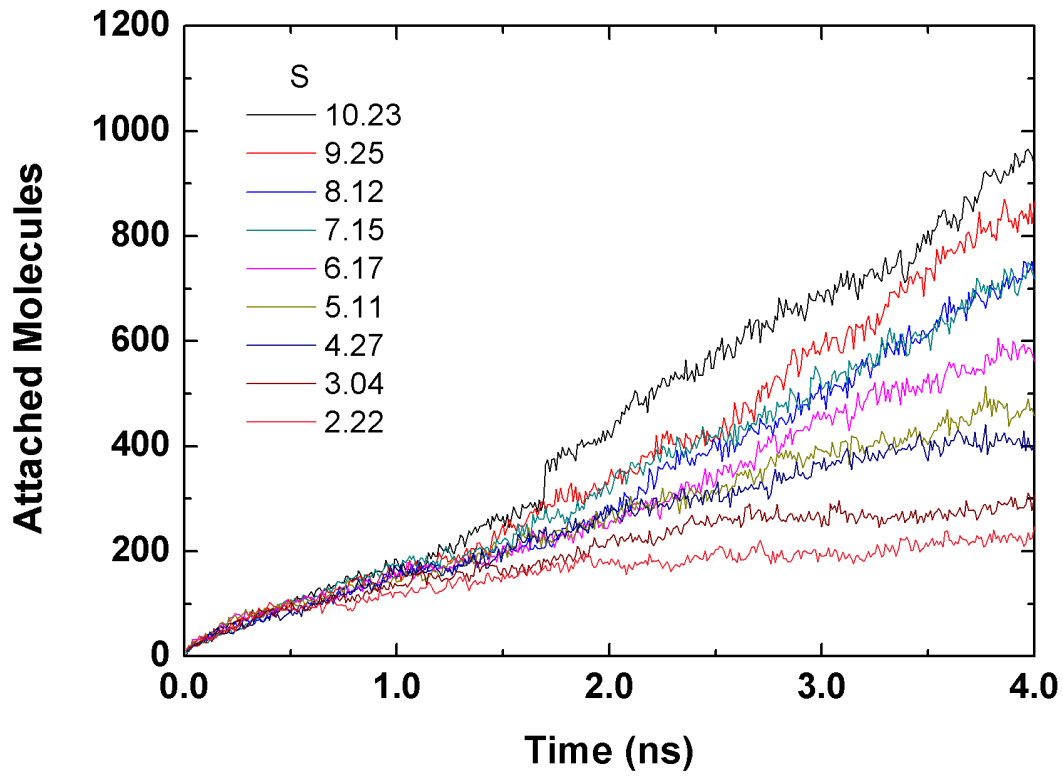

(a) Out L1D1

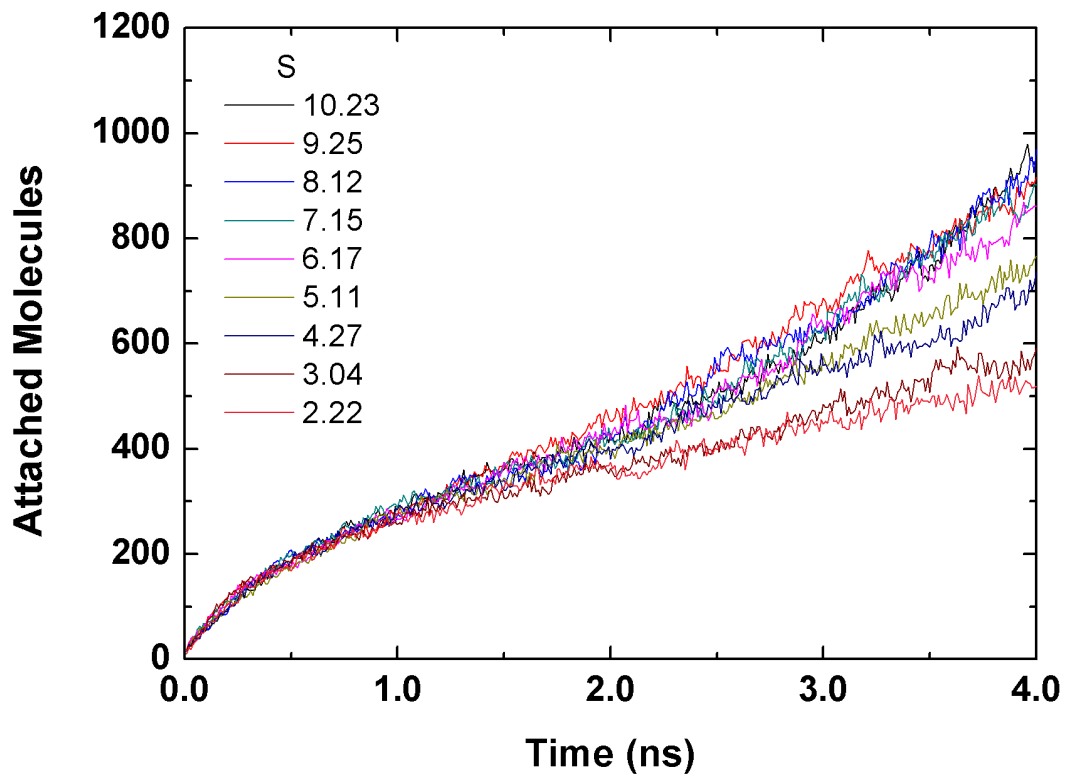

(b) Out L1D2

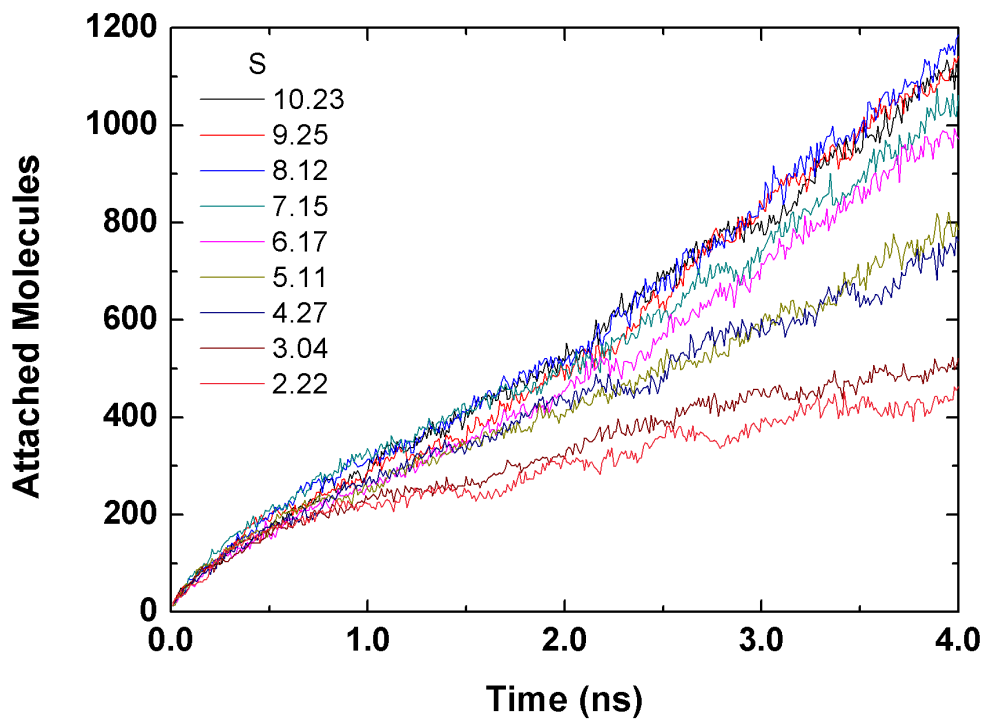

(c) Out L2D1

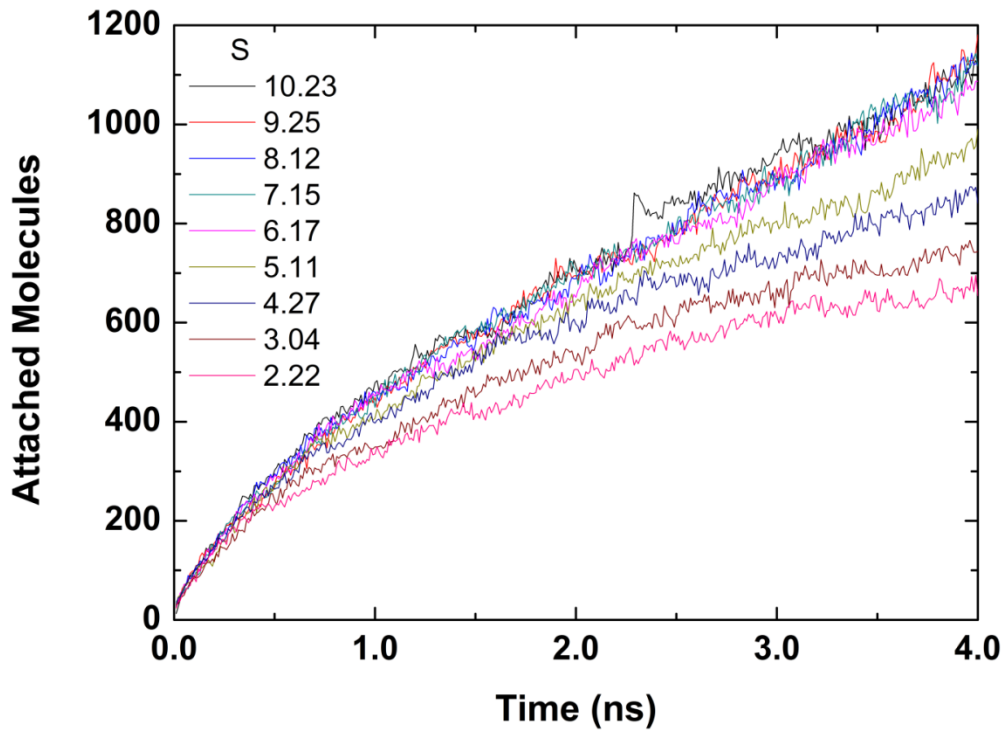

(d) Out L2D2

Fig. S2 Time evolution of outside growth (a) L1D1 (b) L1D2 (c) L2D1 and (d) L2D2.

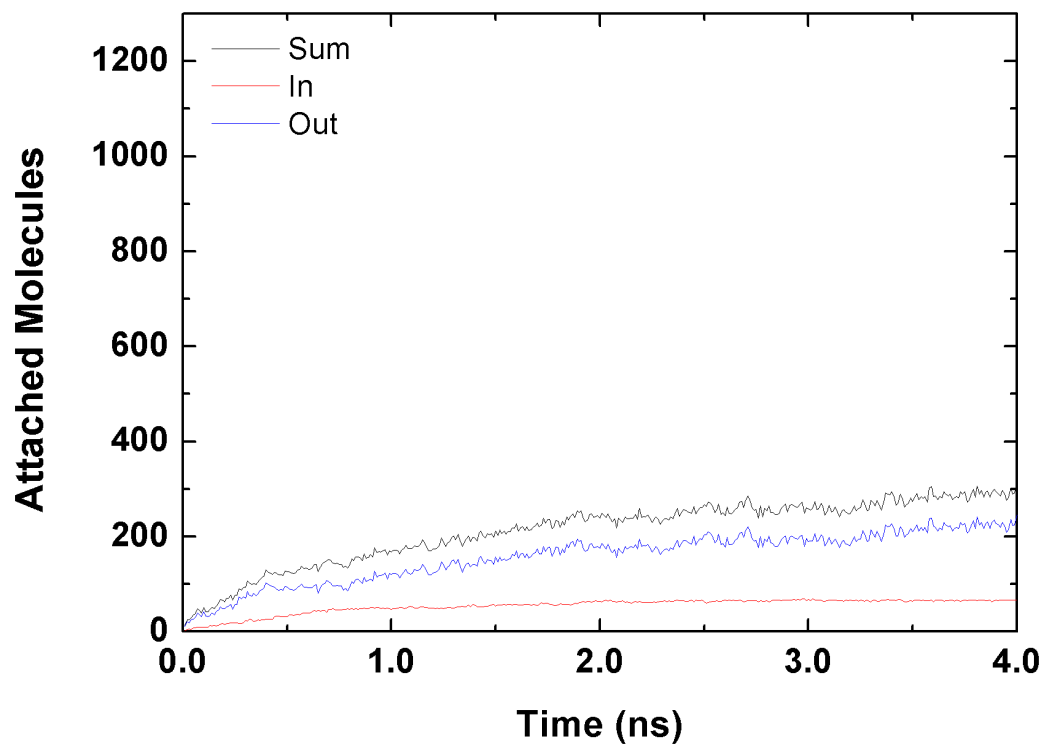

(a) S=2 L1D1

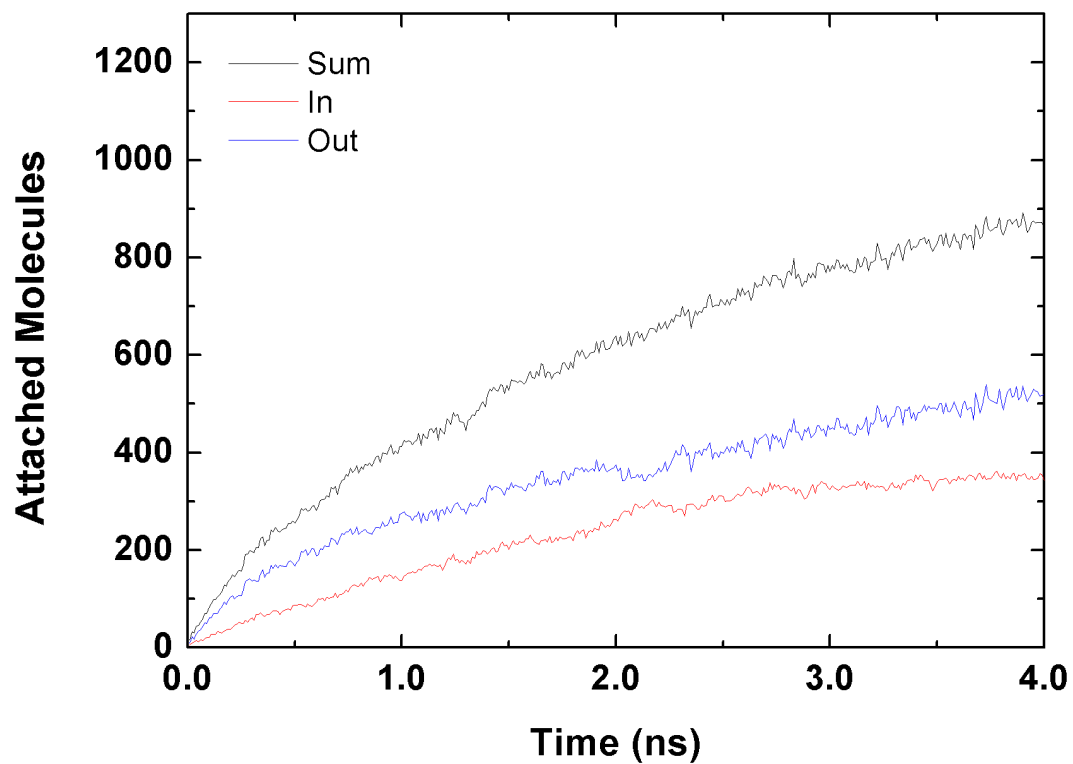

(b) S=2 L1D2

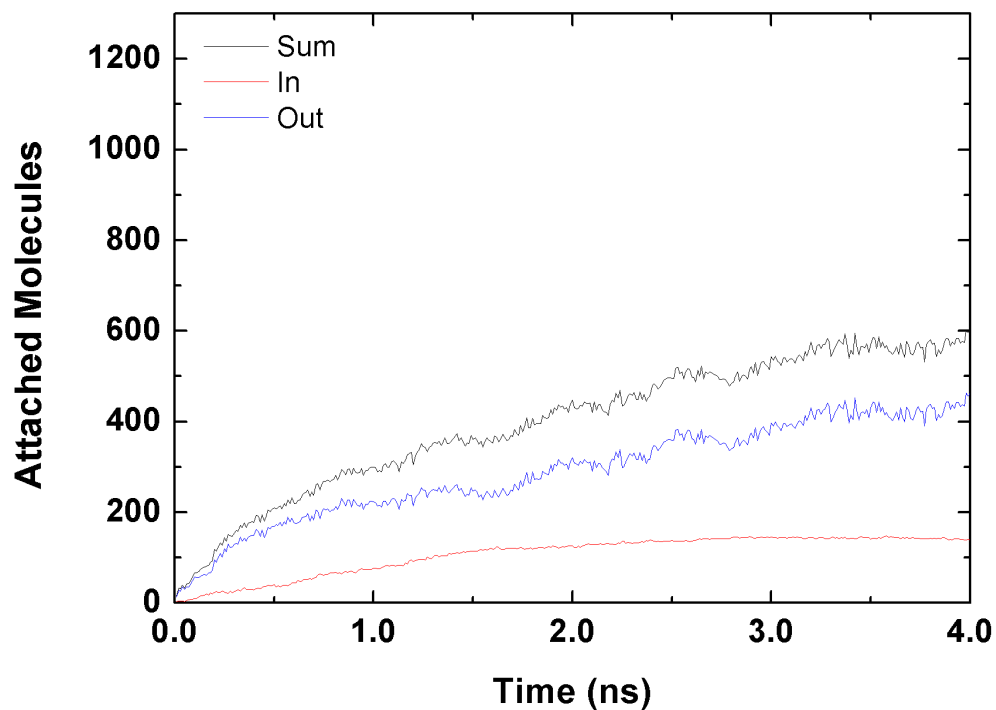

(c) S=2 L2D1

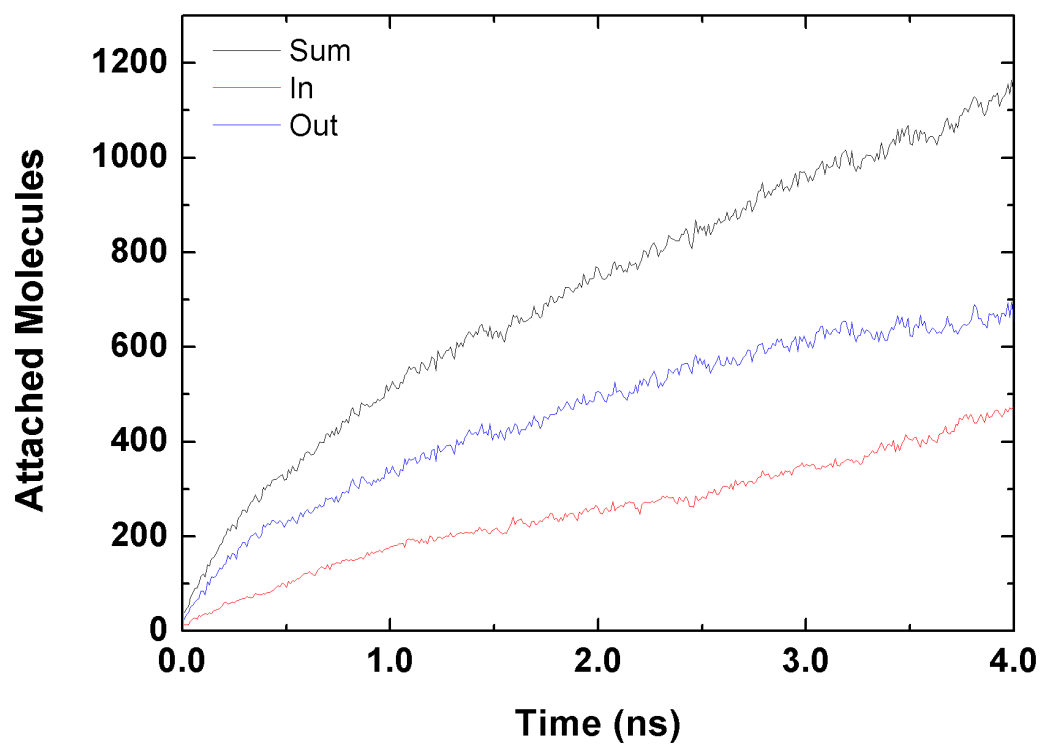

(d) S=2 L2D2

Fig. S3 Time evolution of inside and outside growth for S=2 (a) L1D1 (b) L1D2 (c) L2D1 and (d) L2D2.

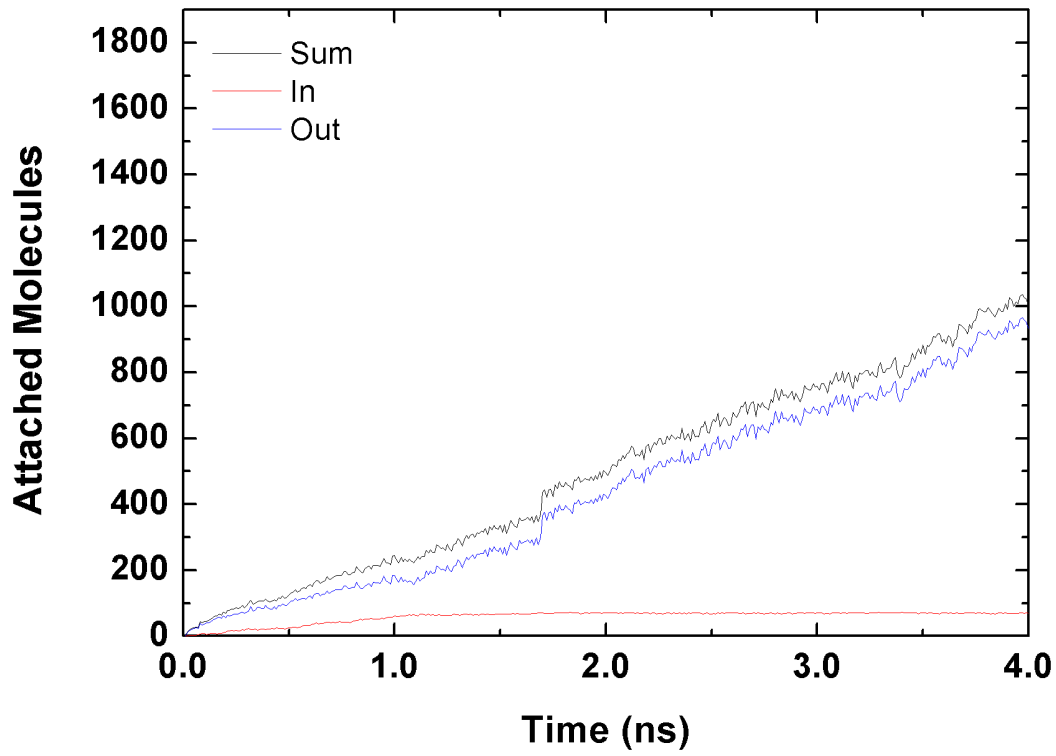

(a) S=10 L1D1

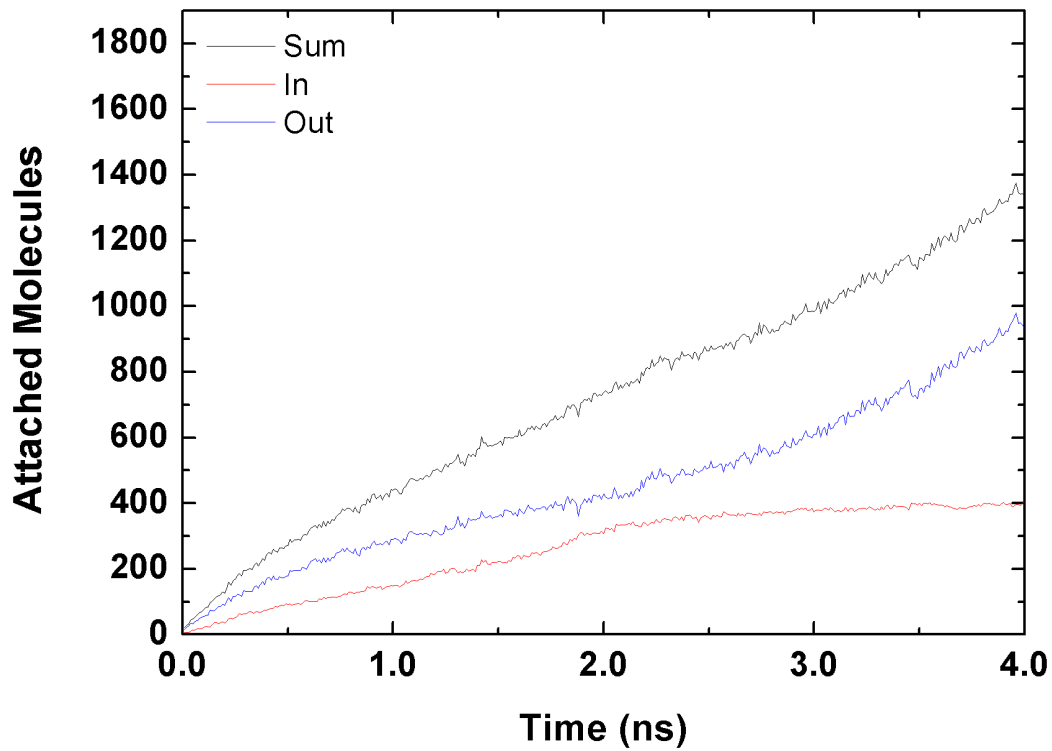

(b) S=10 L1D2

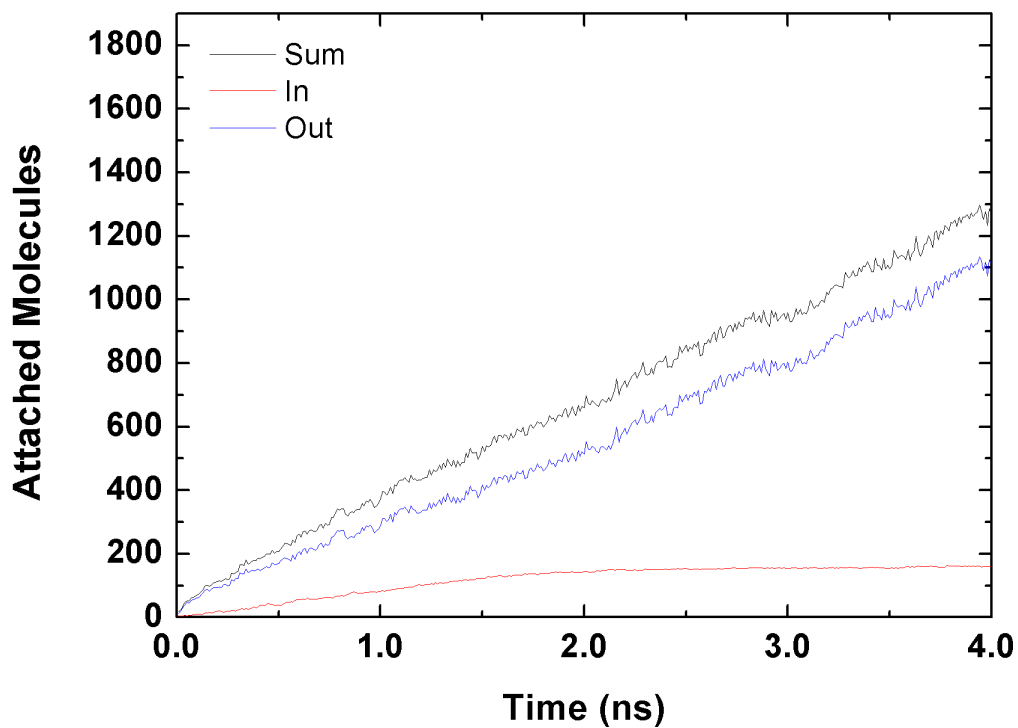

(c) S=10 L2D1

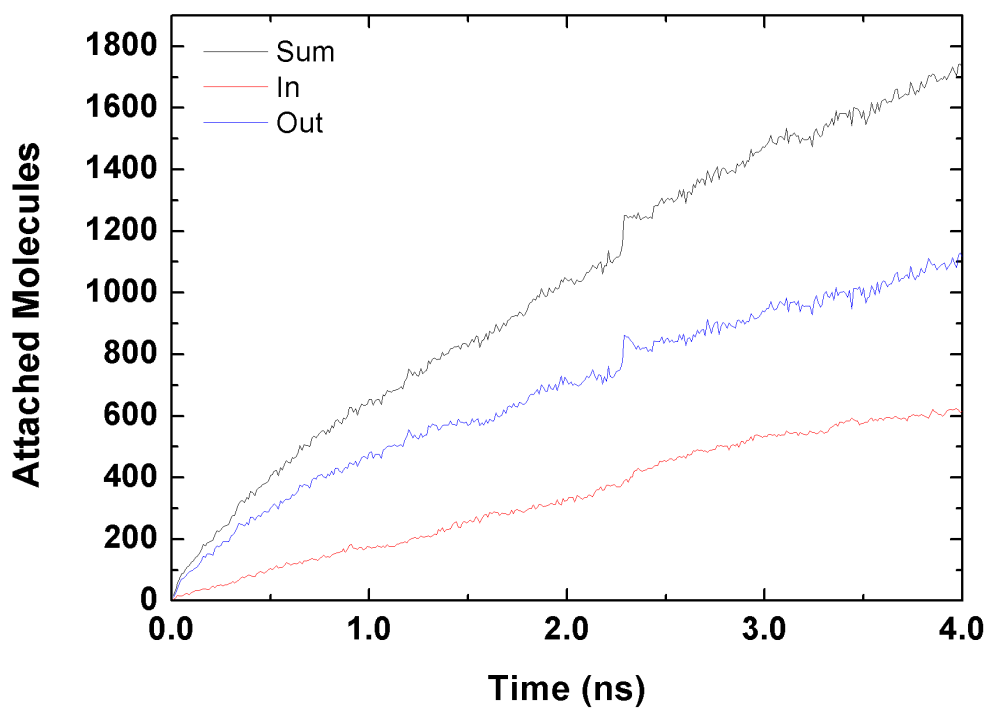

(d) S=10 L2D2

Fig. S4 Time evolution of inside and outside growth for S=10 (a) L1D1 (b) L1D2 (c) L2D1 and (d) L2D2.



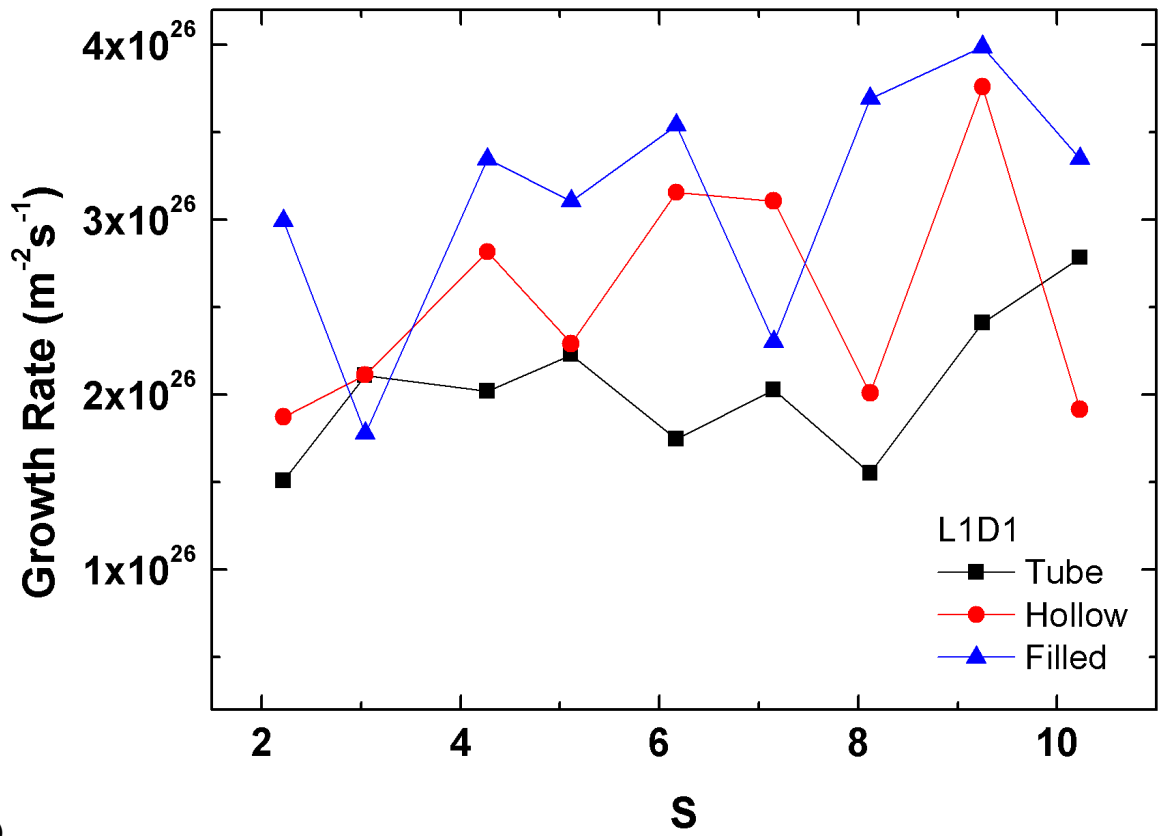

(a)

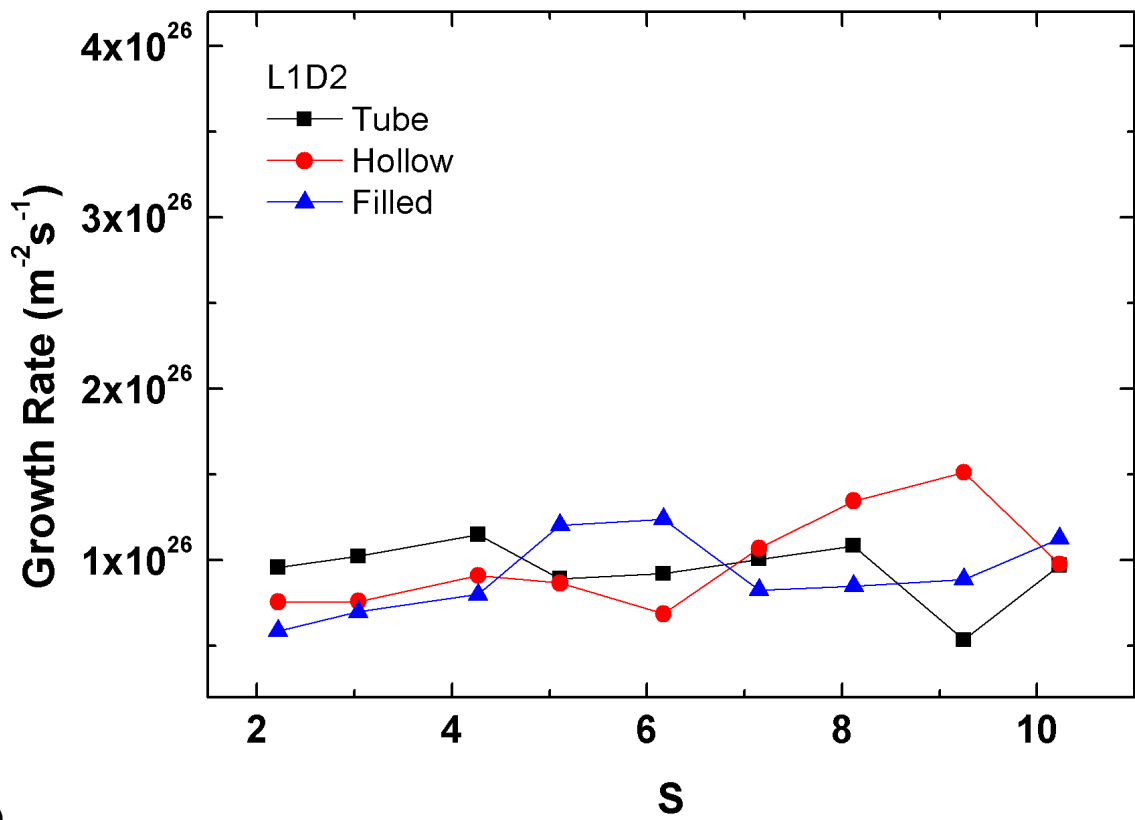

(b)

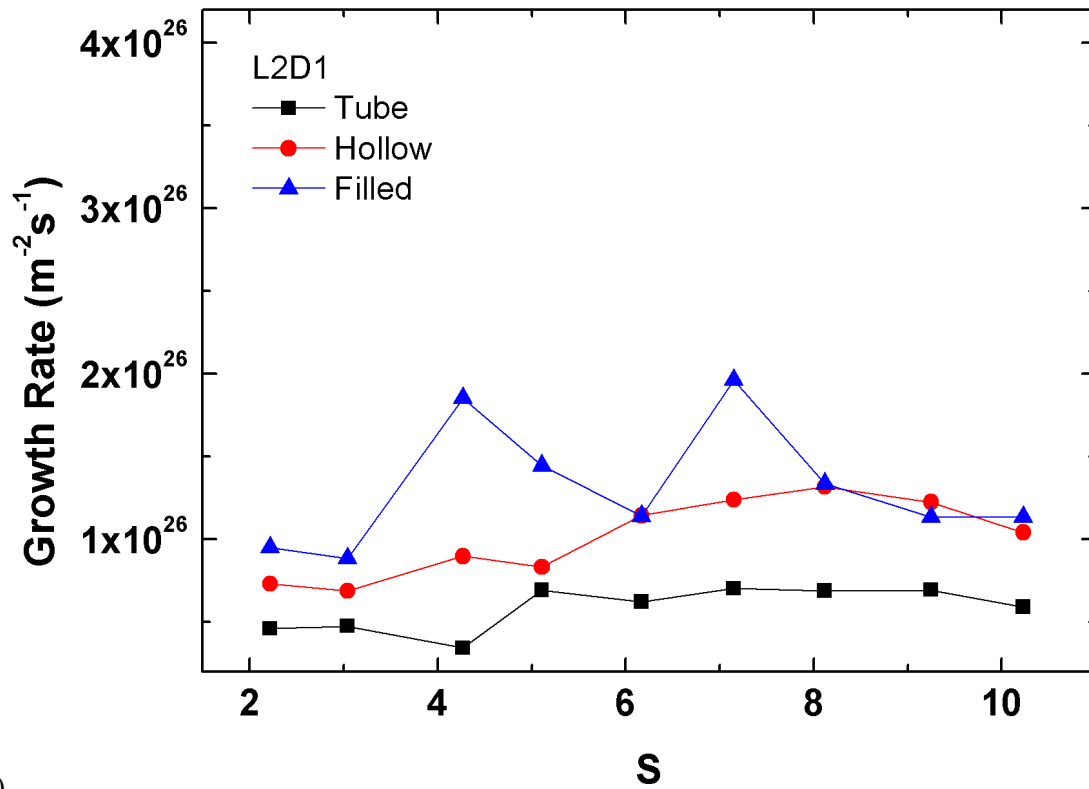

(c)

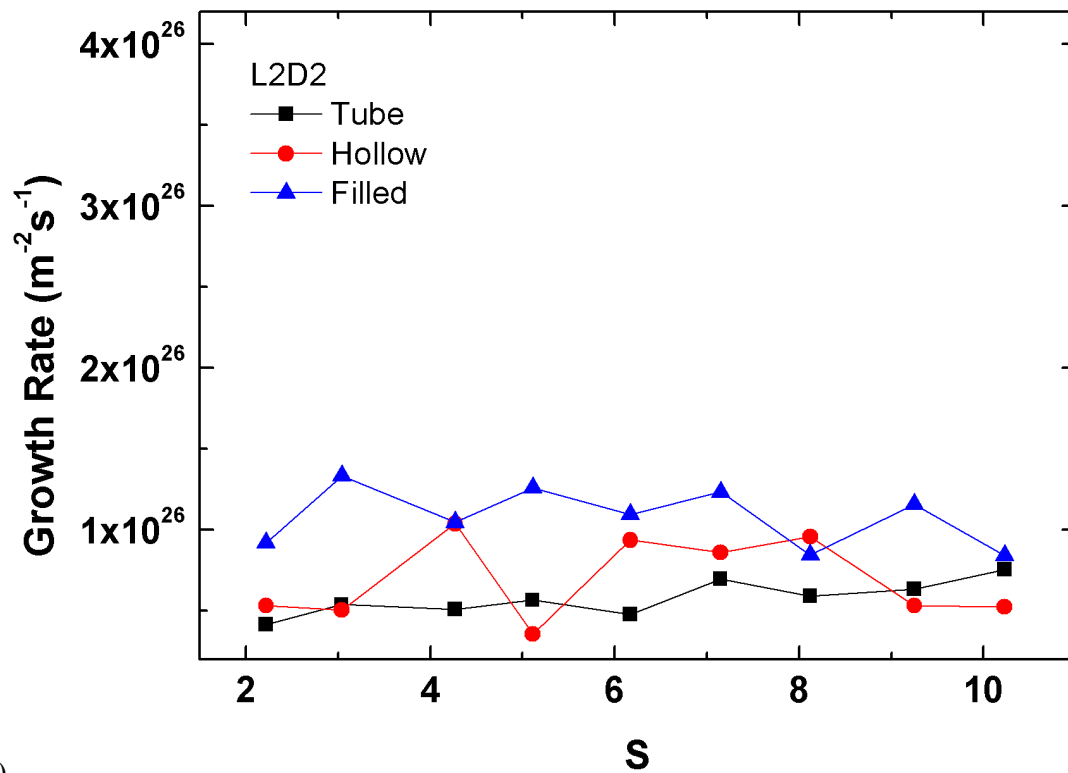

(d)

Fig. S5 Growth rates for all types of tubes, hollow and filled cylinders.

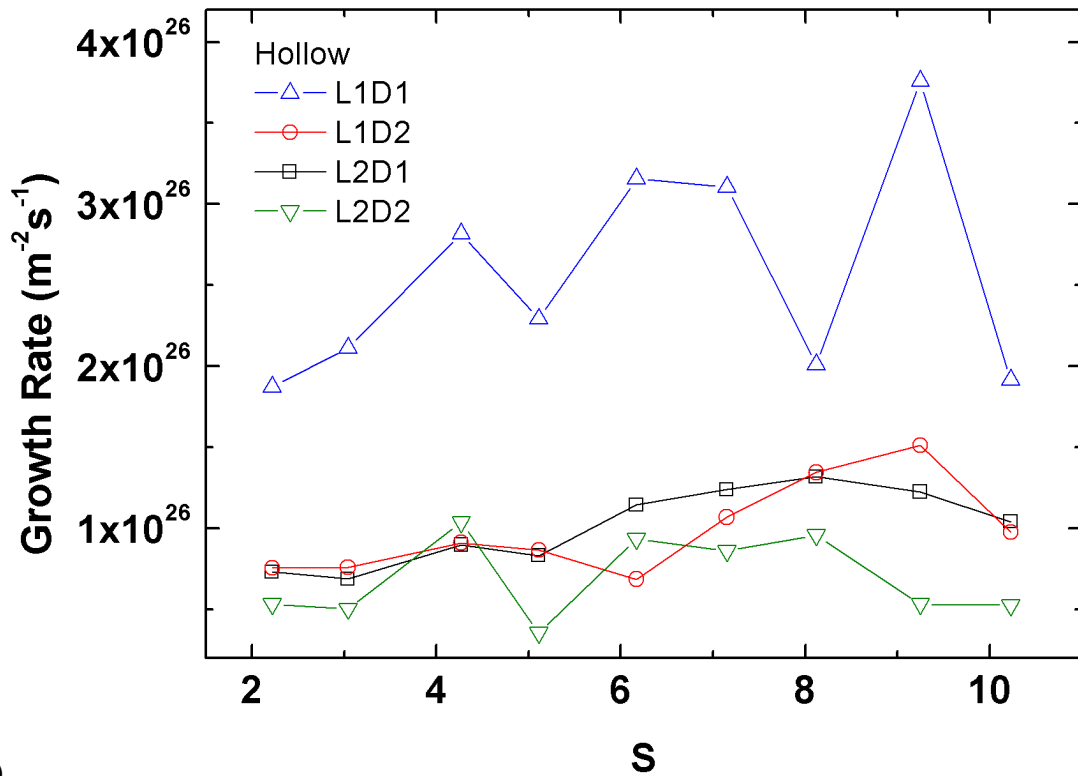

(a)

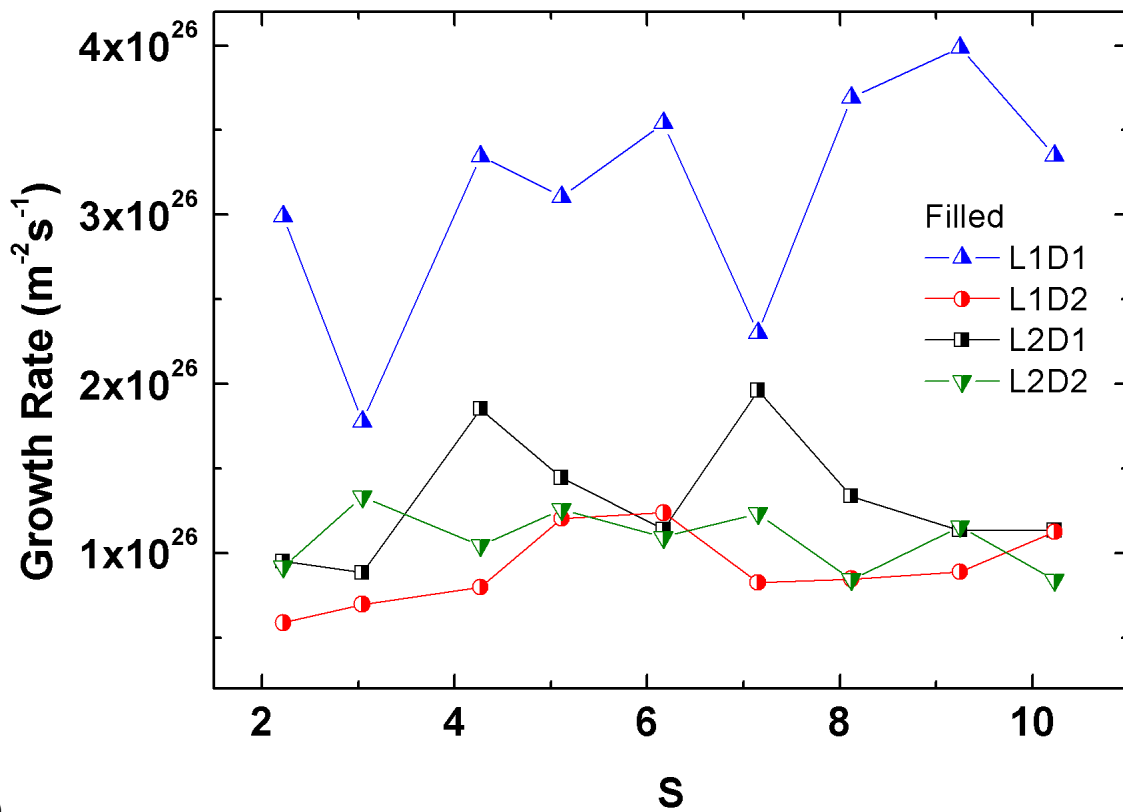

(b)

Fig. S6 Growth rates for the (a) hollow and (b) filled cylinders.

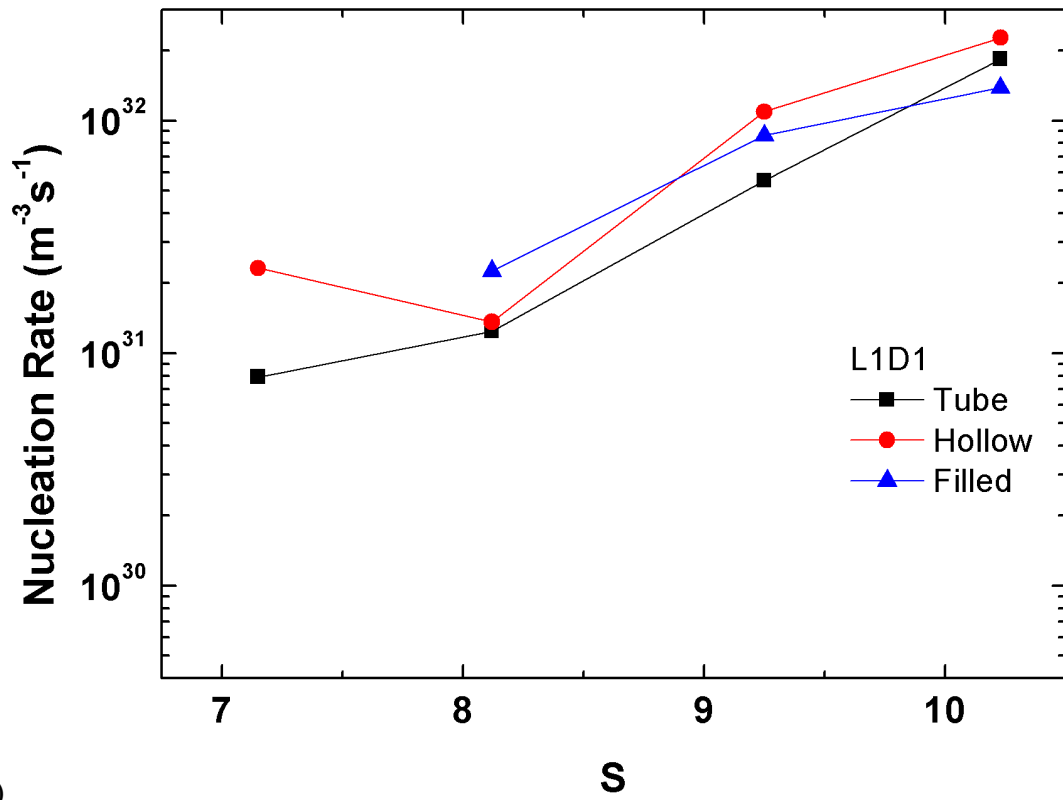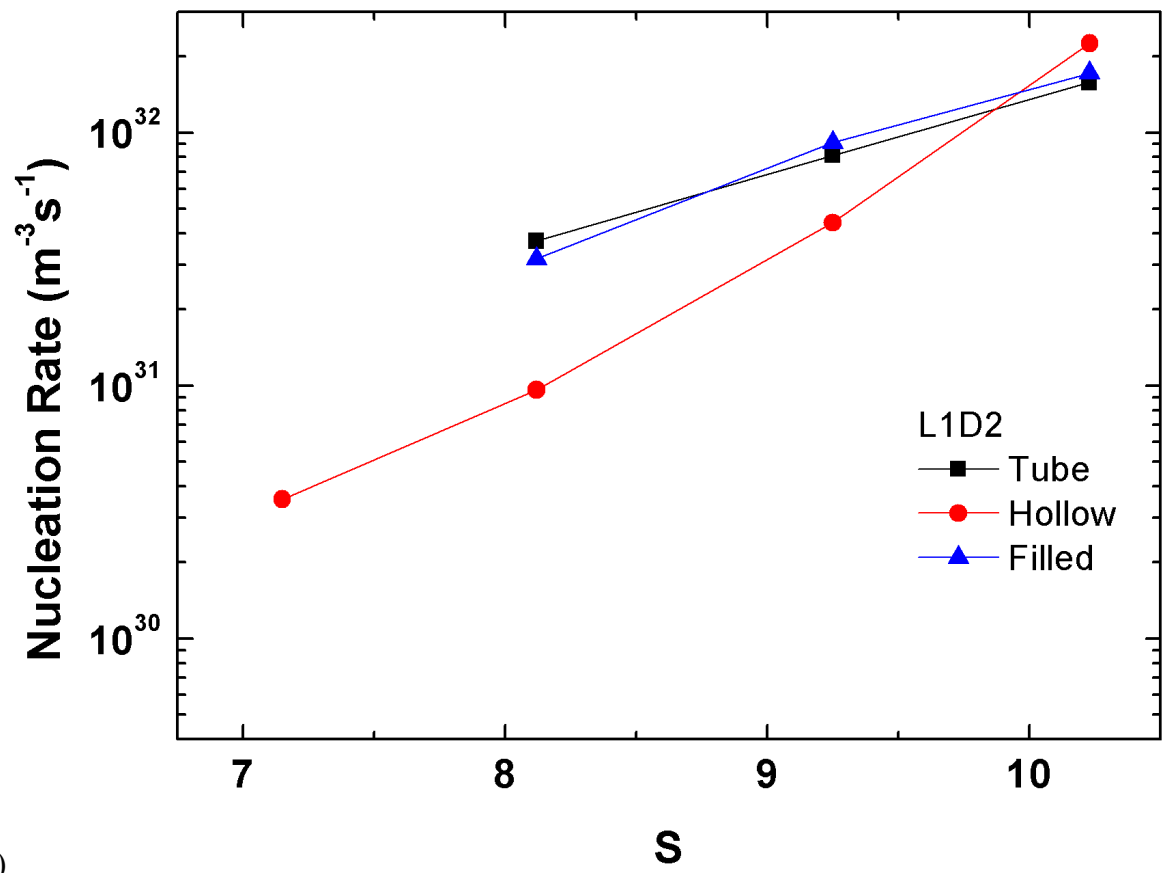

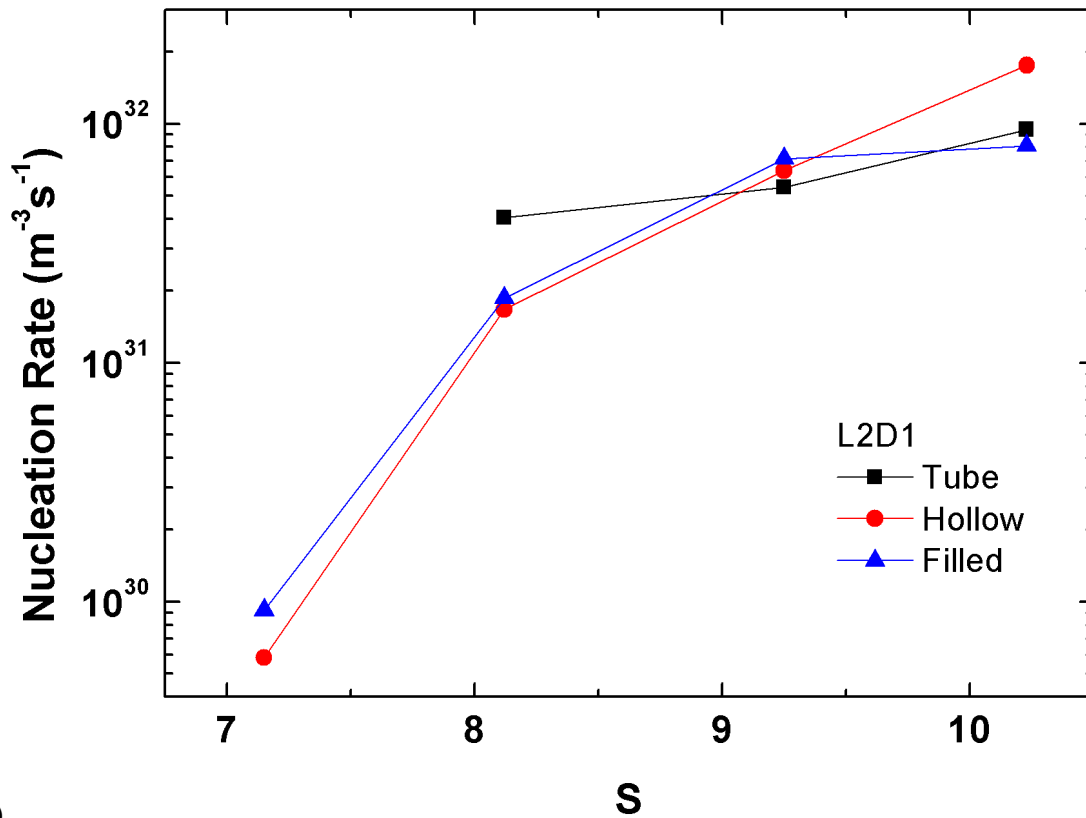

(c)

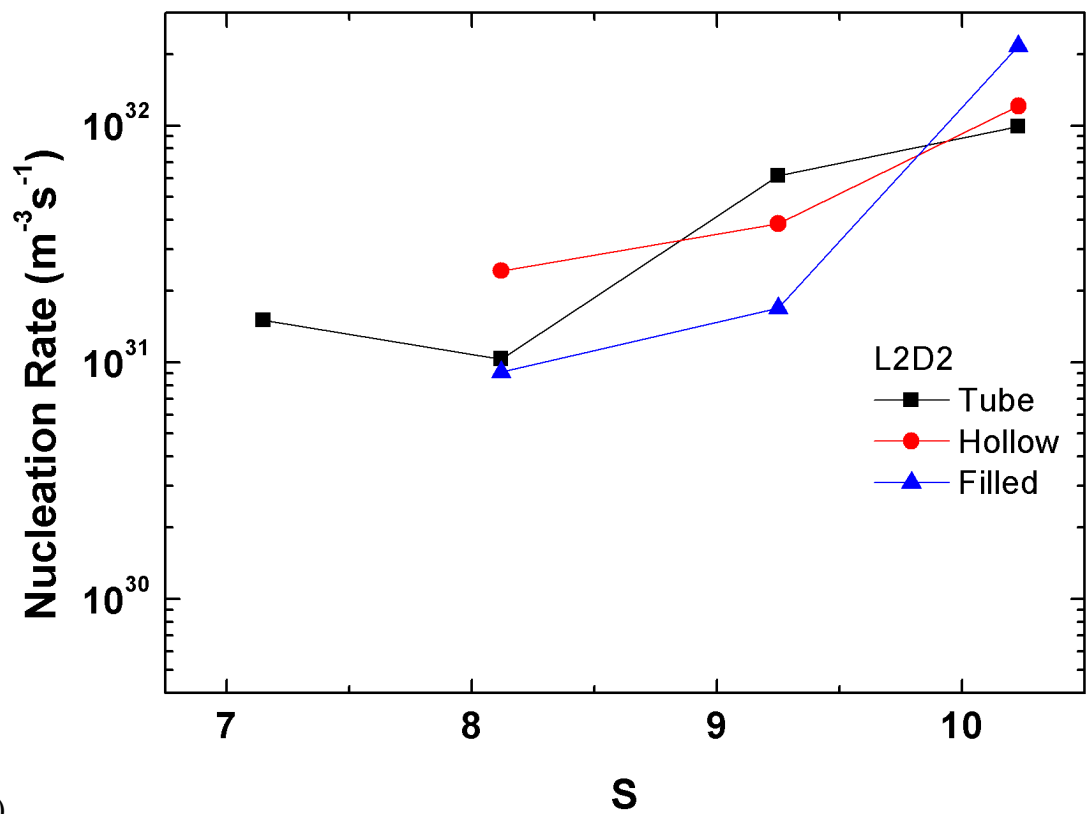

(d)

Fig. S7 Homogeneous nucleation rates for all types of the tube, hollow and filled cylinder.

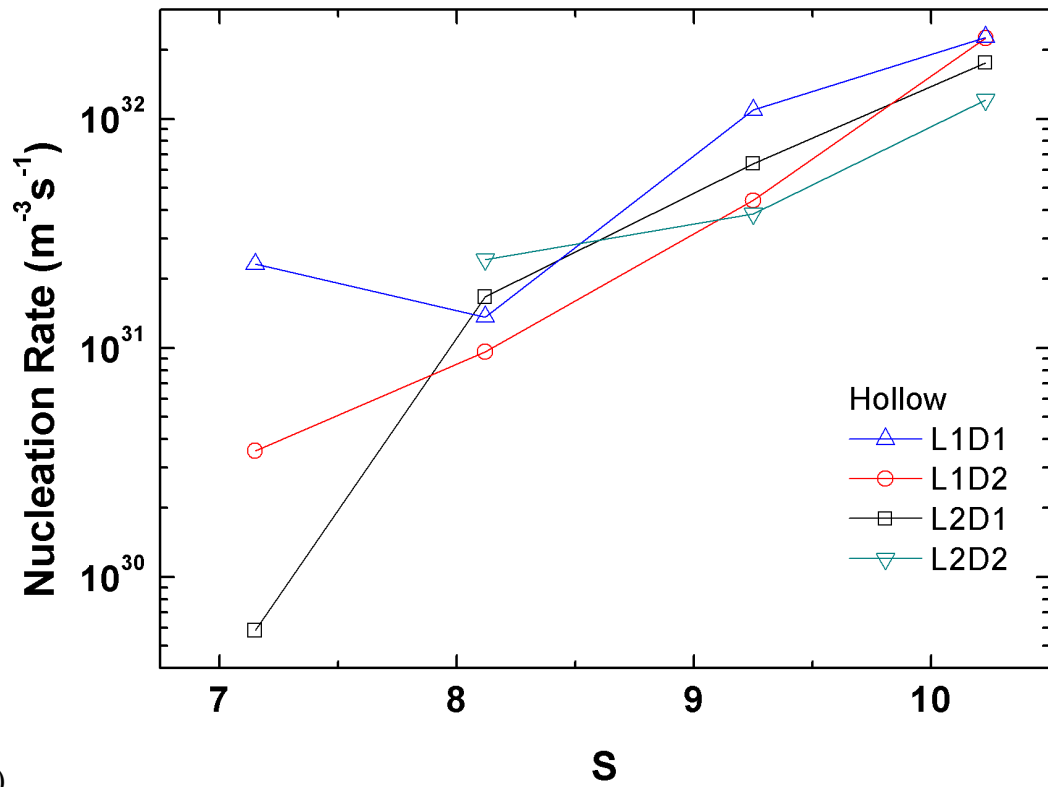

(a)

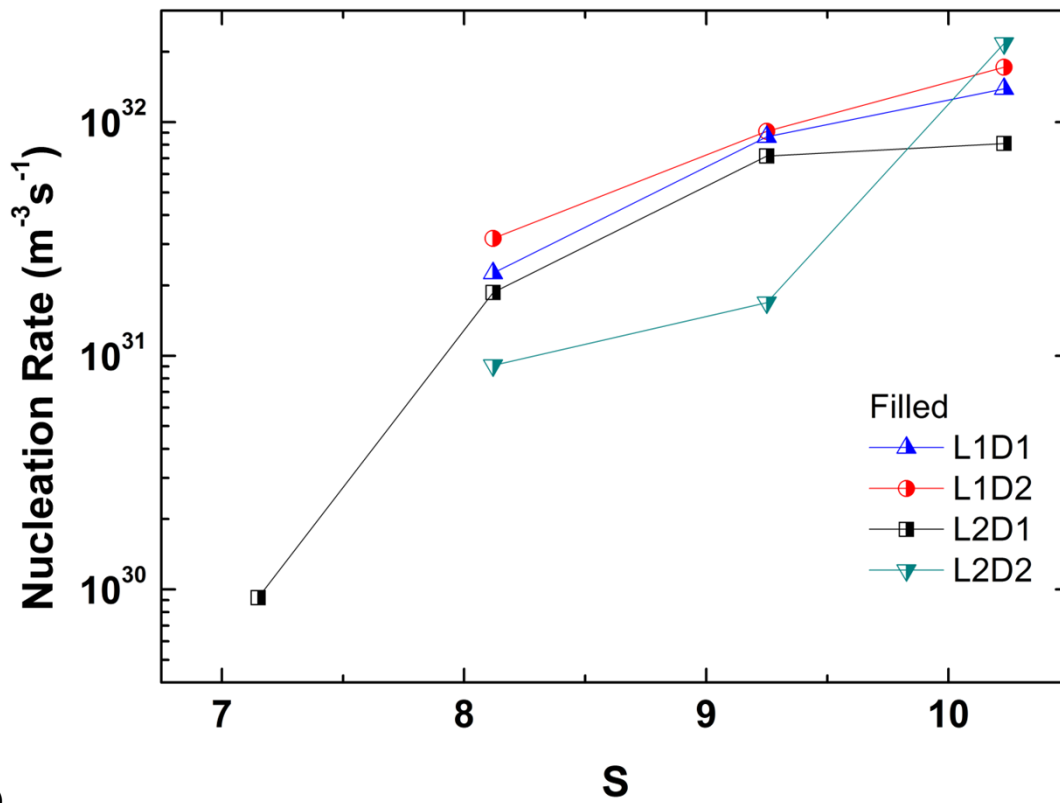

(b)

**Fig. S8** Different arrangement of the homogeneous nucleation rates for all types of the hollow and filled cylinder.
